# Supplementary material for: Characterization of the Role of Extracellular Vesicles Released from Chicken Tracheal Cells in the Antiviral Responses against Avian Influenza Virus
Source: MDPI journal article supplement (doi:10.3390/membranes12010053), 2021-12-31
Supplement: s1 [file s1]

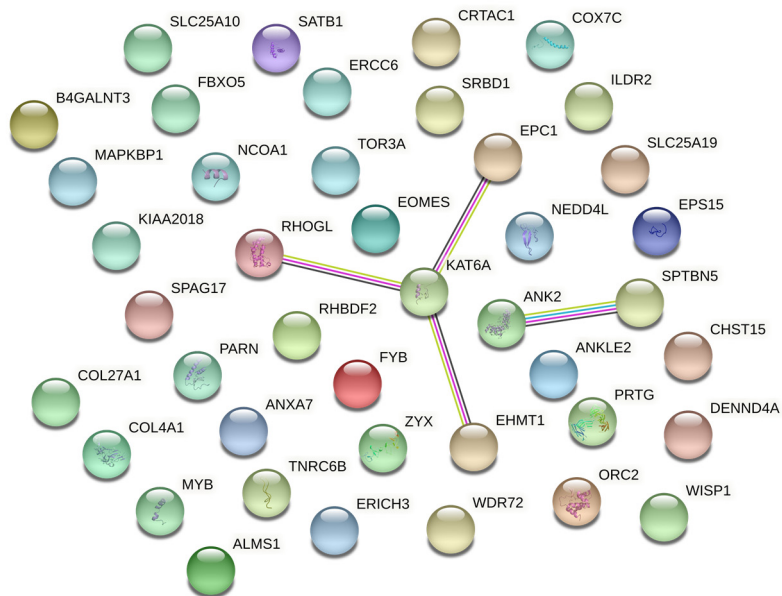

(d)

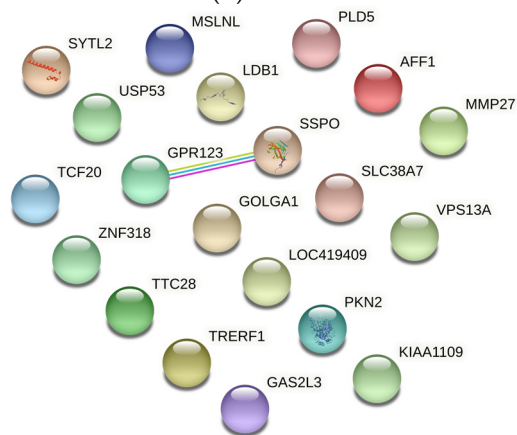

(e)

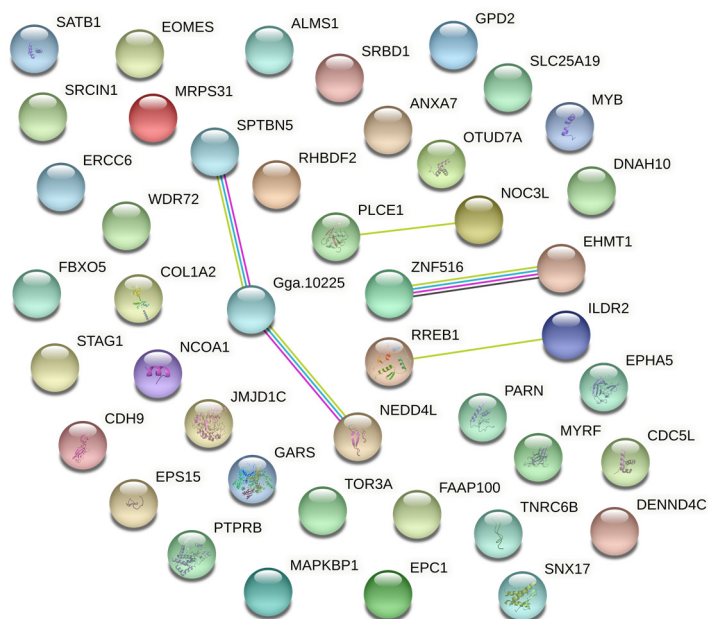

(f)

**Figure S1.** Network analysis of protein-protein interactions among AIV upregulated. (a), AIV down-regulated (b), LPS up-regulated (c), LPS down-regulated (d), polyI:Cup-regulated (e), and polyI:C down-regulated (f) groups of EVs from TOCs, obtained from STRING database, where blue edges represent known interactions from curated databases, purple edges represent experimentally determined known interactions, yellow edges represent interactions from textmining, and black edges represent interactions from co-expression.
